# Supplementary material for: The epidemiology of personality disorders in the Sao Paulo Megacity general population
Source: PubMed Central journal article supplement (PMC5978986; doi:10.1371/journal.pone.0195581), 2018-04-24

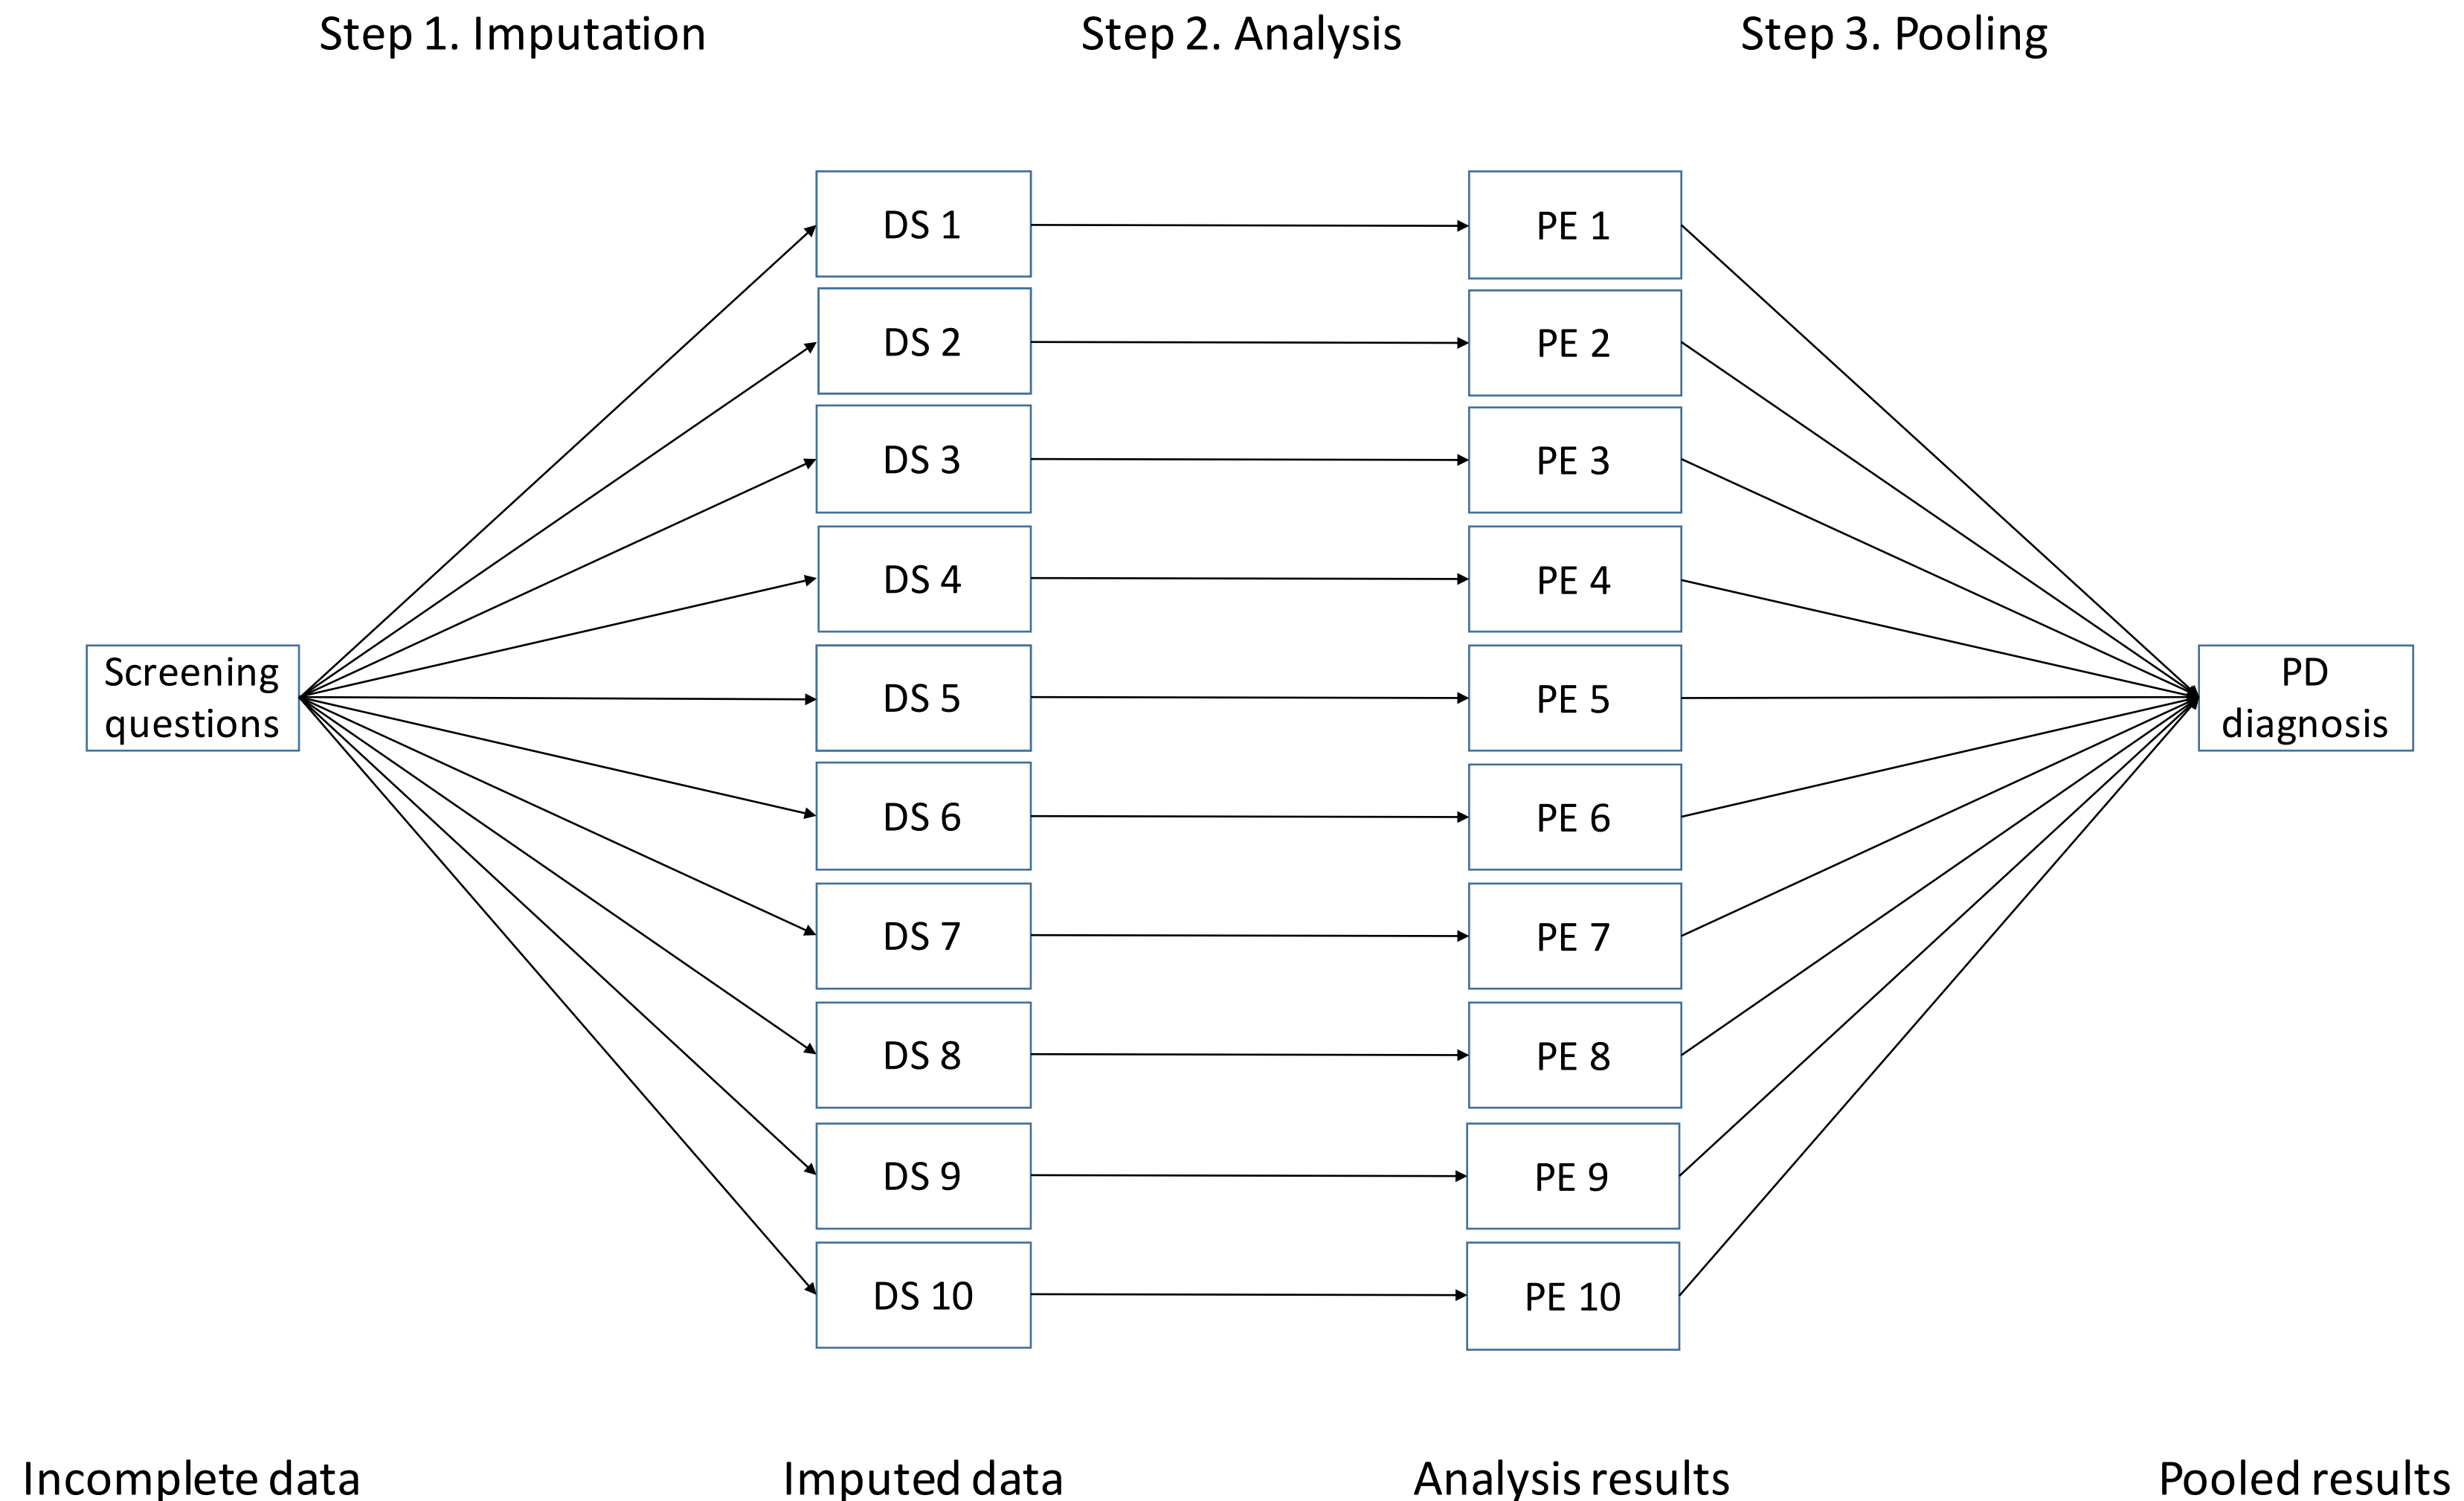

Supplement: pone.0195581.s001.pdf [file pone.0195581.s001.pdf]
